# Supplementary material for: ZnO-modified activated carbon derived from rambutan (Nephelium lappaceum) peel and seeds for efficient methylene blue removal: adsorption mechanism and artificial neural network modeling
Source: Royal Society of Chemistry journal article supplement (doi:10.1039/d6ra01824f), 2026-04-10
Supplement: d6ra01824f1.pdf [file d6ra01824f1.pdf]

## Supplementary Information

### Title: ZnO-Modified Activated Carbon Derived from Rambutan (*Nephelium lappaceum*) Peel and Seed for Efficient Methylene Blue Removal: Adsorption Mechanism and Artificial Neural Network Modeling

Table S1. Experimental dataset used for ANN training and validation

| Mass (g) | Temp (K) | Co (mg/L) | pH | Time (min) | H (%) |
|----------|----------|-----------|----|------------|-------|
| 0.01     | 298      | 51.22     | 7  | 120        | 53.63 |
| 0.02     | 298      | 51.22     | 7  | 120        | 73.38 |
| 0.03     | 298      | 51.22     | 7  | 120        | 86.40 |
| 0.04     | 298      | 51.22     | 7  | 120        | 95.53 |
| 0.05     | 298      | 51.22     | 7  | 120        | 98.60 |
| 0.06     | 298      | 51.22     | 7  | 120        | 98.99 |
| 0.07     | 298      | 51.22     | 7  | 120        | 99.46 |
| 0.05     | 308      | 156.10    | 7  | 120        | 59.25 |
| 0.05     | 308      | 156.10    | 7  | 120        | 74.89 |
| 0.05     | 308      | 156.10    | 7  | 120        | 78.56 |
| 0.05     | 308      | 156.10    | 7  | 120        | 86.47 |
| 0.05     | 318      | 152.20    | 7  | 120        | 83.18 |
| 0.05     | 318      | 152.20    | 7  | 120        | 92.51 |
| 0.05     | 318      | 152.20    | 7  | 120        | 94.79 |
| 0.05     | 318      | 152.20    | 7  | 120        | 98.58 |
| 0.05     | 328      | 150.70    | 7  | 120        | 91.95 |
| 0.05     | 328      | 150.70    | 7  | 120        | 97.81 |
| 0.05     | 328      | 150.70    | 7  | 120        | 99.10 |
| 0.05     | 328      | 150.70    | 7  | 120        | 99.99 |
| 0.05     | 298      | 49.10     | 7  | 120        | 97.12 |
| 0.05     | 298      | 102.30    | 7  | 120        | 97.03 |
| 0.05     | 298      | 157.70    | 7  | 120        | 81.20 |
| 0.05     | 298      | 200.00    | 7  | 120        | 69.47 |
| 0.05     | 298      | 270.00    | 7  | 120        | 56.87 |
| 0.05     | 298      | 310.50    | 7  | 120        | 55.22 |
| 0.05     | 298      | 407.30    | 7  | 120        | 43.27 |
| 0.05     | 298      | 537.50    | 7  | 120        | 38.92 |
| 0.05     | 298      | 50.50     | 3  | 120        | 87.23 |
| 0.05     | 298      | 50.50     | 4  | 120        | 94.38 |
| 0.05     | 298      | 50.50     | 5  | 120        | 95.22 |
| 0.05     | 298      | 50.50     | 6  | 120        | 95.46 |
| 0.05     | 298      | 50.50     | 7  | 120        | 96.59 |
| 0.05     | 298      | 50.50     | 8  | 120        | 96.05 |
| 0.05     | 298      | 50.50     | 9  | 120        | 95.52 |
| 0.05     | 298      | 49.90     | 7  | 30         | 86.33 |
| 0.05     | 298      | 49.90     | 7  | 60         | 96.60 |
| 0.05     | 298      | 49.90     | 7  | 90         | 97.21 |
| 0.05     | 298      | 49.90     | 7  | 120        | 97.81 |
| 0.05     | 298      | 49.90     | 7  | 150        | 98.05 |
| 0.05     | 298      | 67.50     | 7  | 30         | 82.28 |
| 0.05     | 298      | 67.50     | 7  | 60         | 92.45 |
| 0.05     | 298      | 67.50     | 7  | 90         | 95.40 |
| 0.05     | 298      | 67.50     | 7  | 120        | 97.48 |
| 0.05     | 298      | 67.50     | 7  | 150        | 98.15 |
| 0.05     | 298      | 89.50     | 7  | 30         | 80.38 |

| Mass (g) | Temp (K) | Co (mg/L) | pH | Time (min) | H (%) |
|----------|----------|-----------|----|------------|-------|
| 0.05     | 298      | 89.50     | 7  | 60         | 86.05 |
| 0.05     | 298      | 89.50     | 7  | 90         | 91.58 |
| 0.05     | 298      | 89.50     | 7  | 120        | 95.84 |
| 0.05     | 298      | 89.50     | 7  | 150        | 97.82 |

**Table S2.** Description and statistical ranges of input and output variables employed in the ANN model. The selected parameters represent the main experimental factors influencing the adsorption process, with removal efficiency (%) considered as the response variable for model training and prediction.

| Variable              | Symbol | Unit | Min   | Max    | Description                                      |
|-----------------------|--------|------|-------|--------|--------------------------------------------------|
| Adsorbent dosage      | m      | g    | 0.01  | 0.07   | Mass of ZnO-ACRPS used in adsorption experiments |
| Temperature           | T      | K    | 298   | 328    | Operating temperature                            |
| Initial concentration | Co     | mg/L | 49.10 | 537.50 | Initial methylene blue concentration             |
| pH                    | pH     | –    | 3     | 9      | Initial solution pH                              |
| Contact time          | t      | min  | 30    | 150    | Adsorption time                                  |
| Removal efficiency    | H      | %    | 38.92 | 99.99  | Output variable (target)                         |

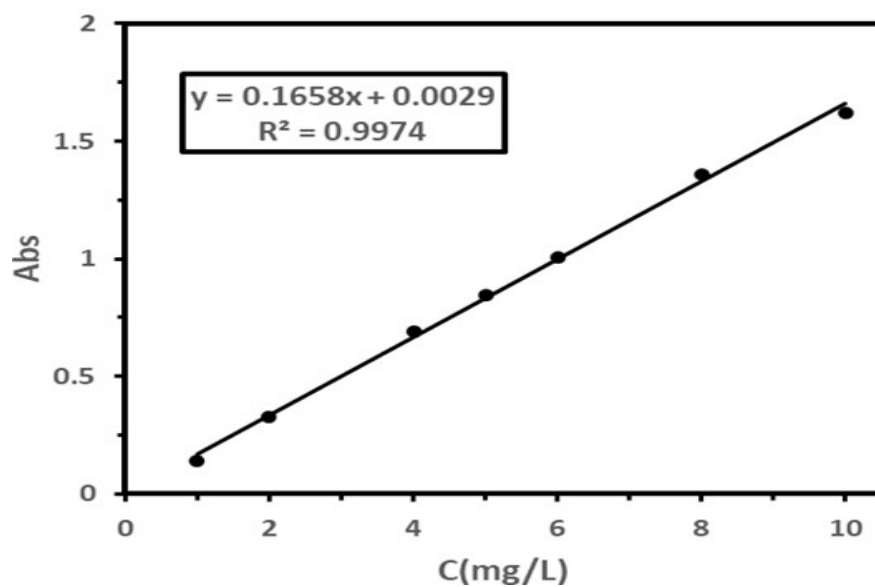

**Figure S1.** Calibration curve for the quantification of Methylene Blue using UV-Vis spectroscopy

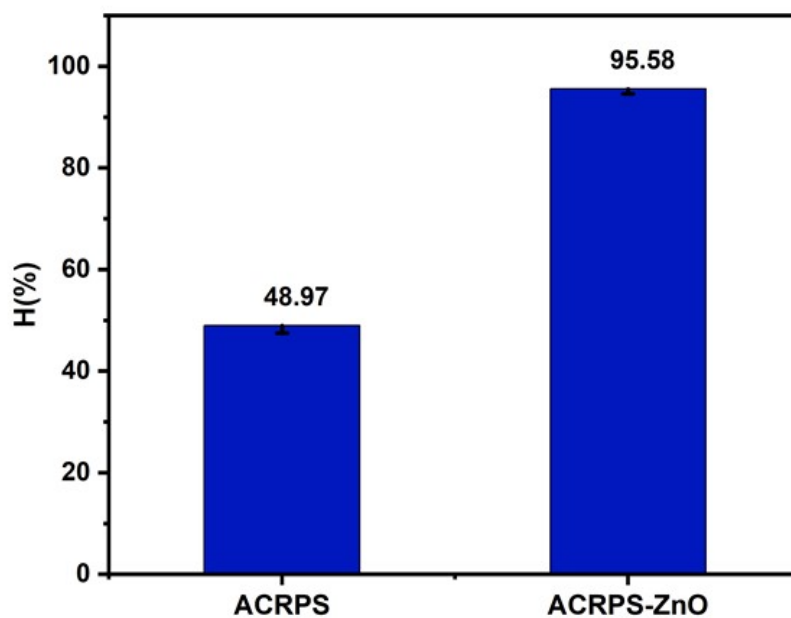

**Figure S2.** Comparison of the adsorption capacity of two materials (ACRPS and ZnO-ACRPS)

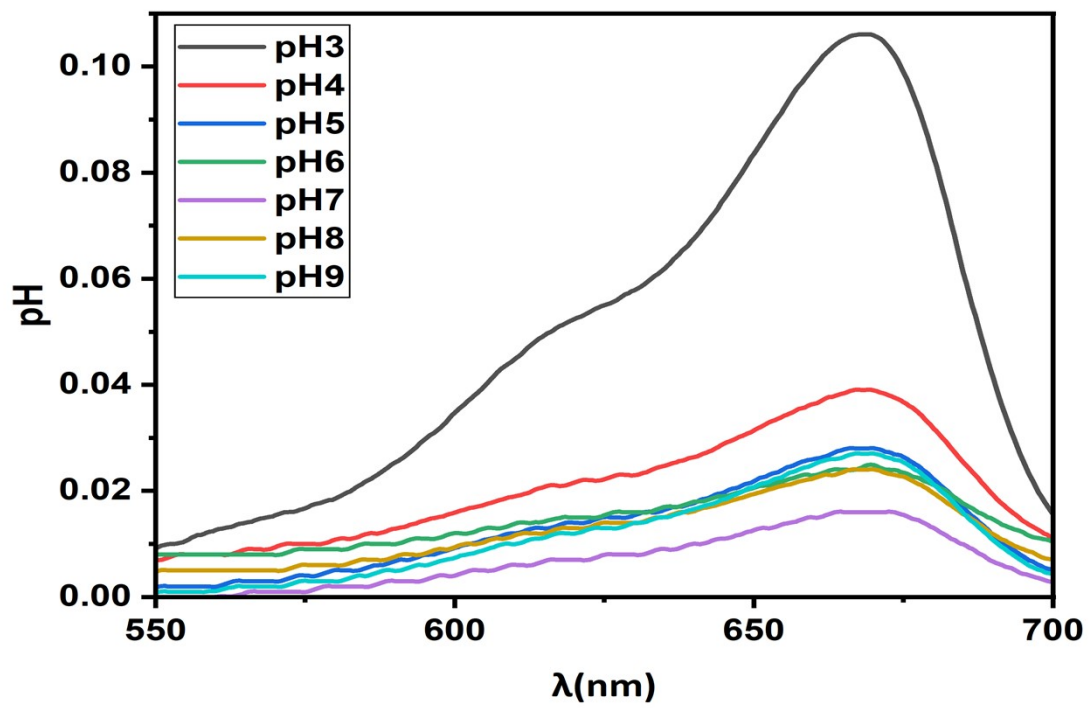

**Figure S3.** Absorbance as a function of pH.

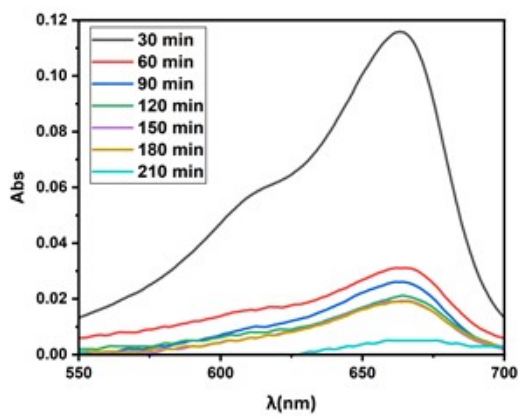

(a)

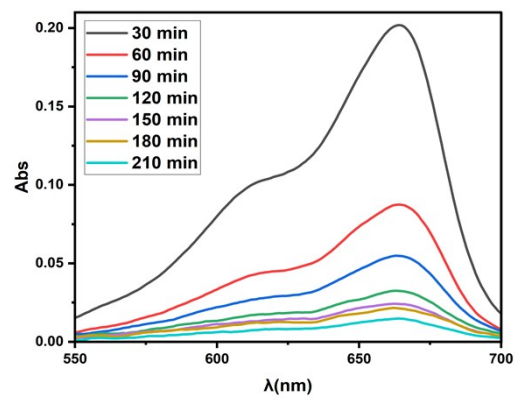

(b)

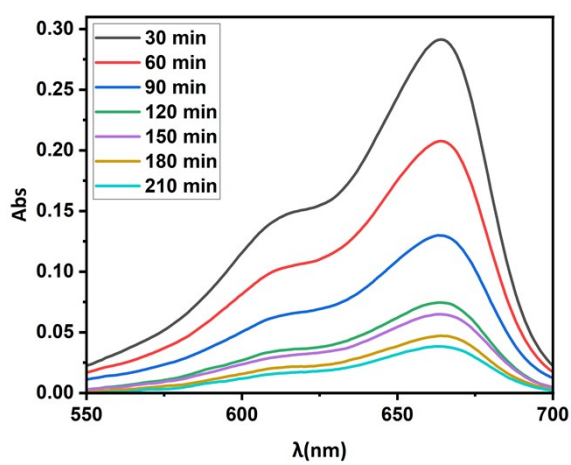

(c)

**Figure S4.** Absorbance as a function of contact time at initial concentrations of 49.89 mg/L (a), 67.46 mg/L (b), and 89.48 mg/L (c).

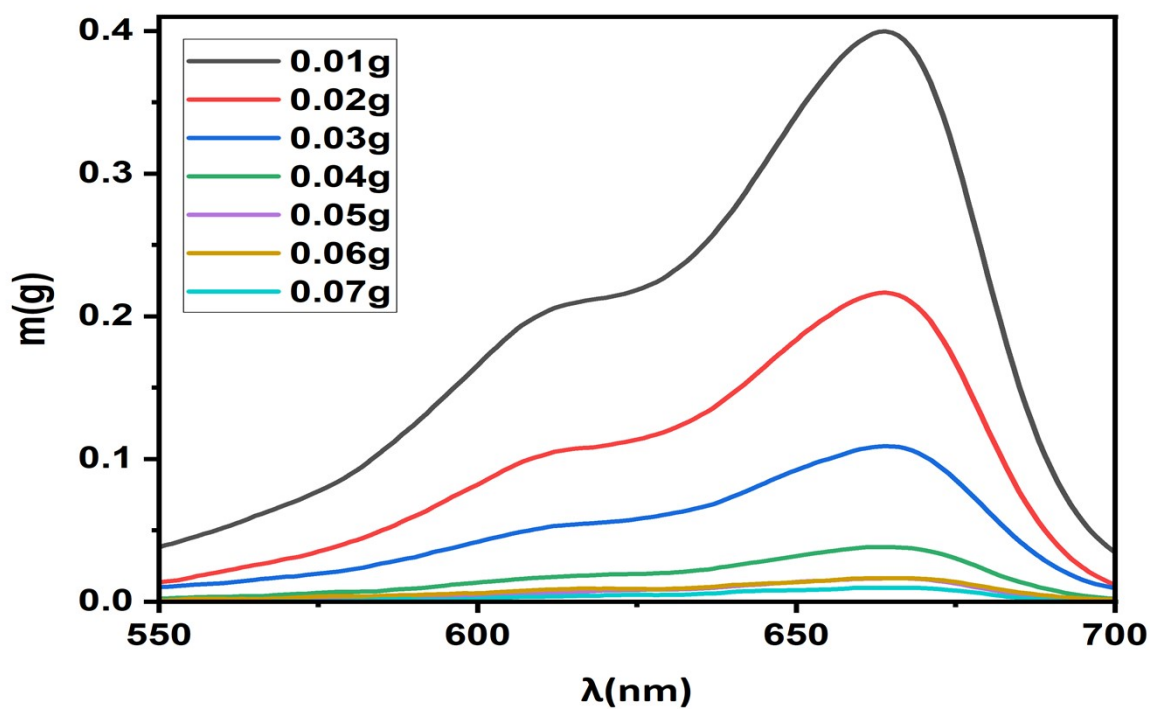

Figure S5. Absorbance as a function of ZnO-ACRPS dosage.

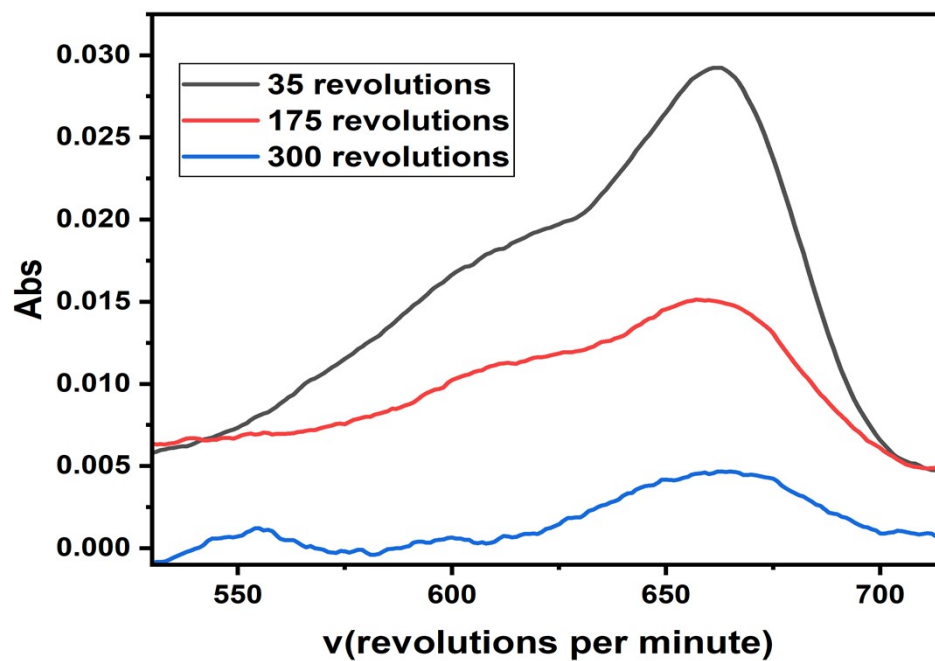

Figure S6. Absorbance as a function of shaking speed.

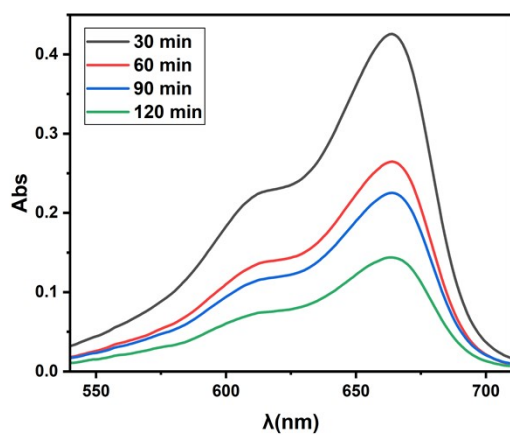

**a**

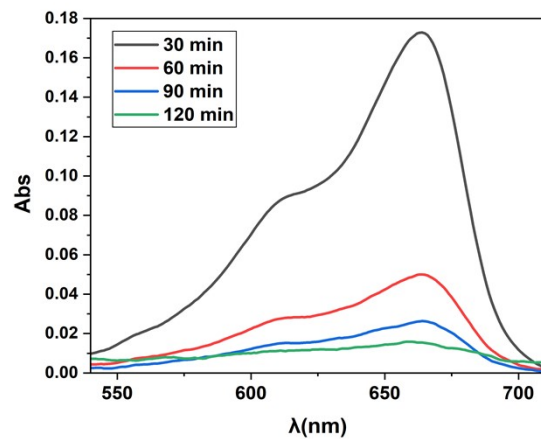

**b**

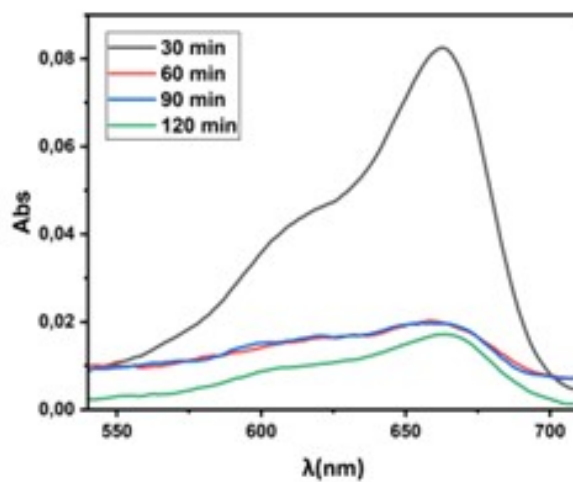

**c**

**Figure S7.** Absorbance as a function of temperature: 308 K (a); 318 K (b); 328 K (c).

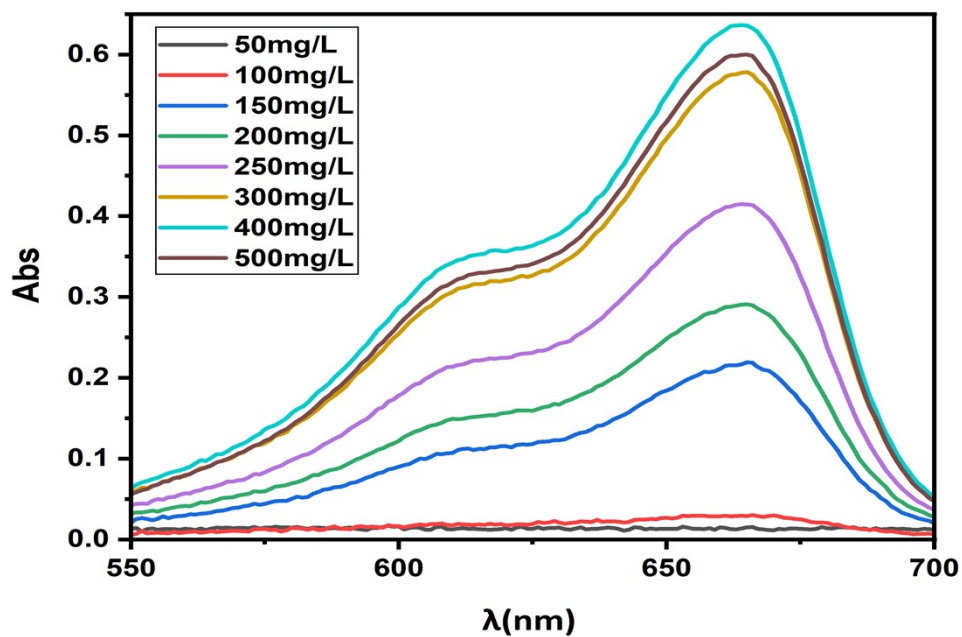

Figure S8. Absorbance as a function of initial concentration

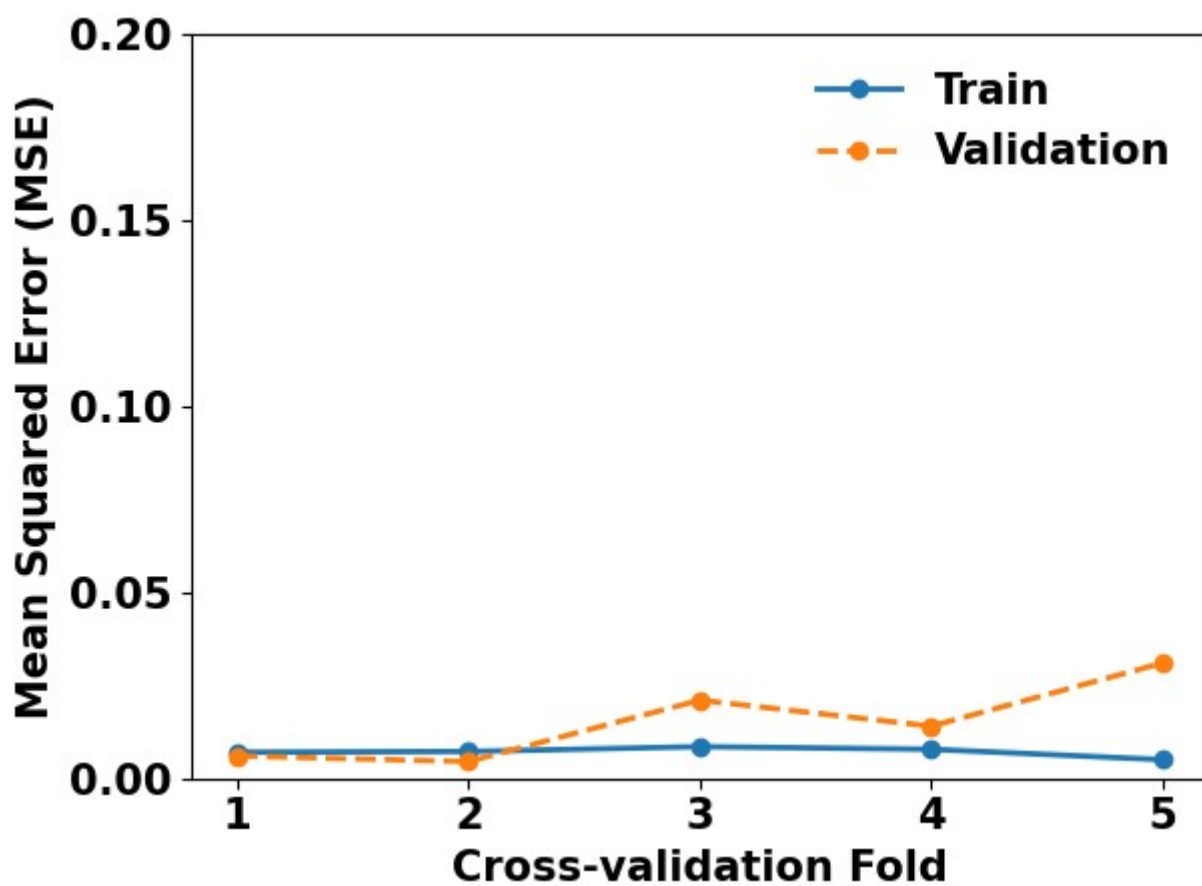

Fig. S9. Cross-validation performance of the ANN model showing the variation of mean squared error (MSE) for training and validation datasets across five folds. The comparable magnitude and consistent trends of training and validation errors demonstrate the robustness and generalization ability of the model, while the absence of

pronounced divergence confirms that overfitting is effectively minimized despite the limited dataset size.

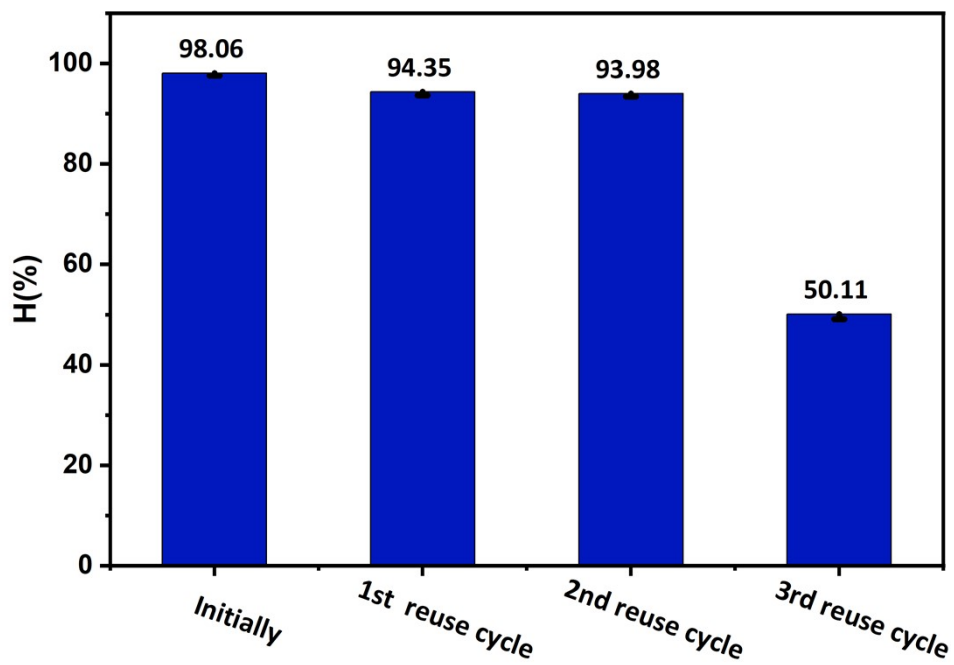

**Figure S10.** Reusability and regeneration efficiency of ZnO-ACRPS for methylene blue removal over three consecutive cycles.
